# Supplementary material
Source: MDPI journal article supplement (https://www.mdpi.com/1424-2818/13/11/529)
Supplement: s1 [file s1]

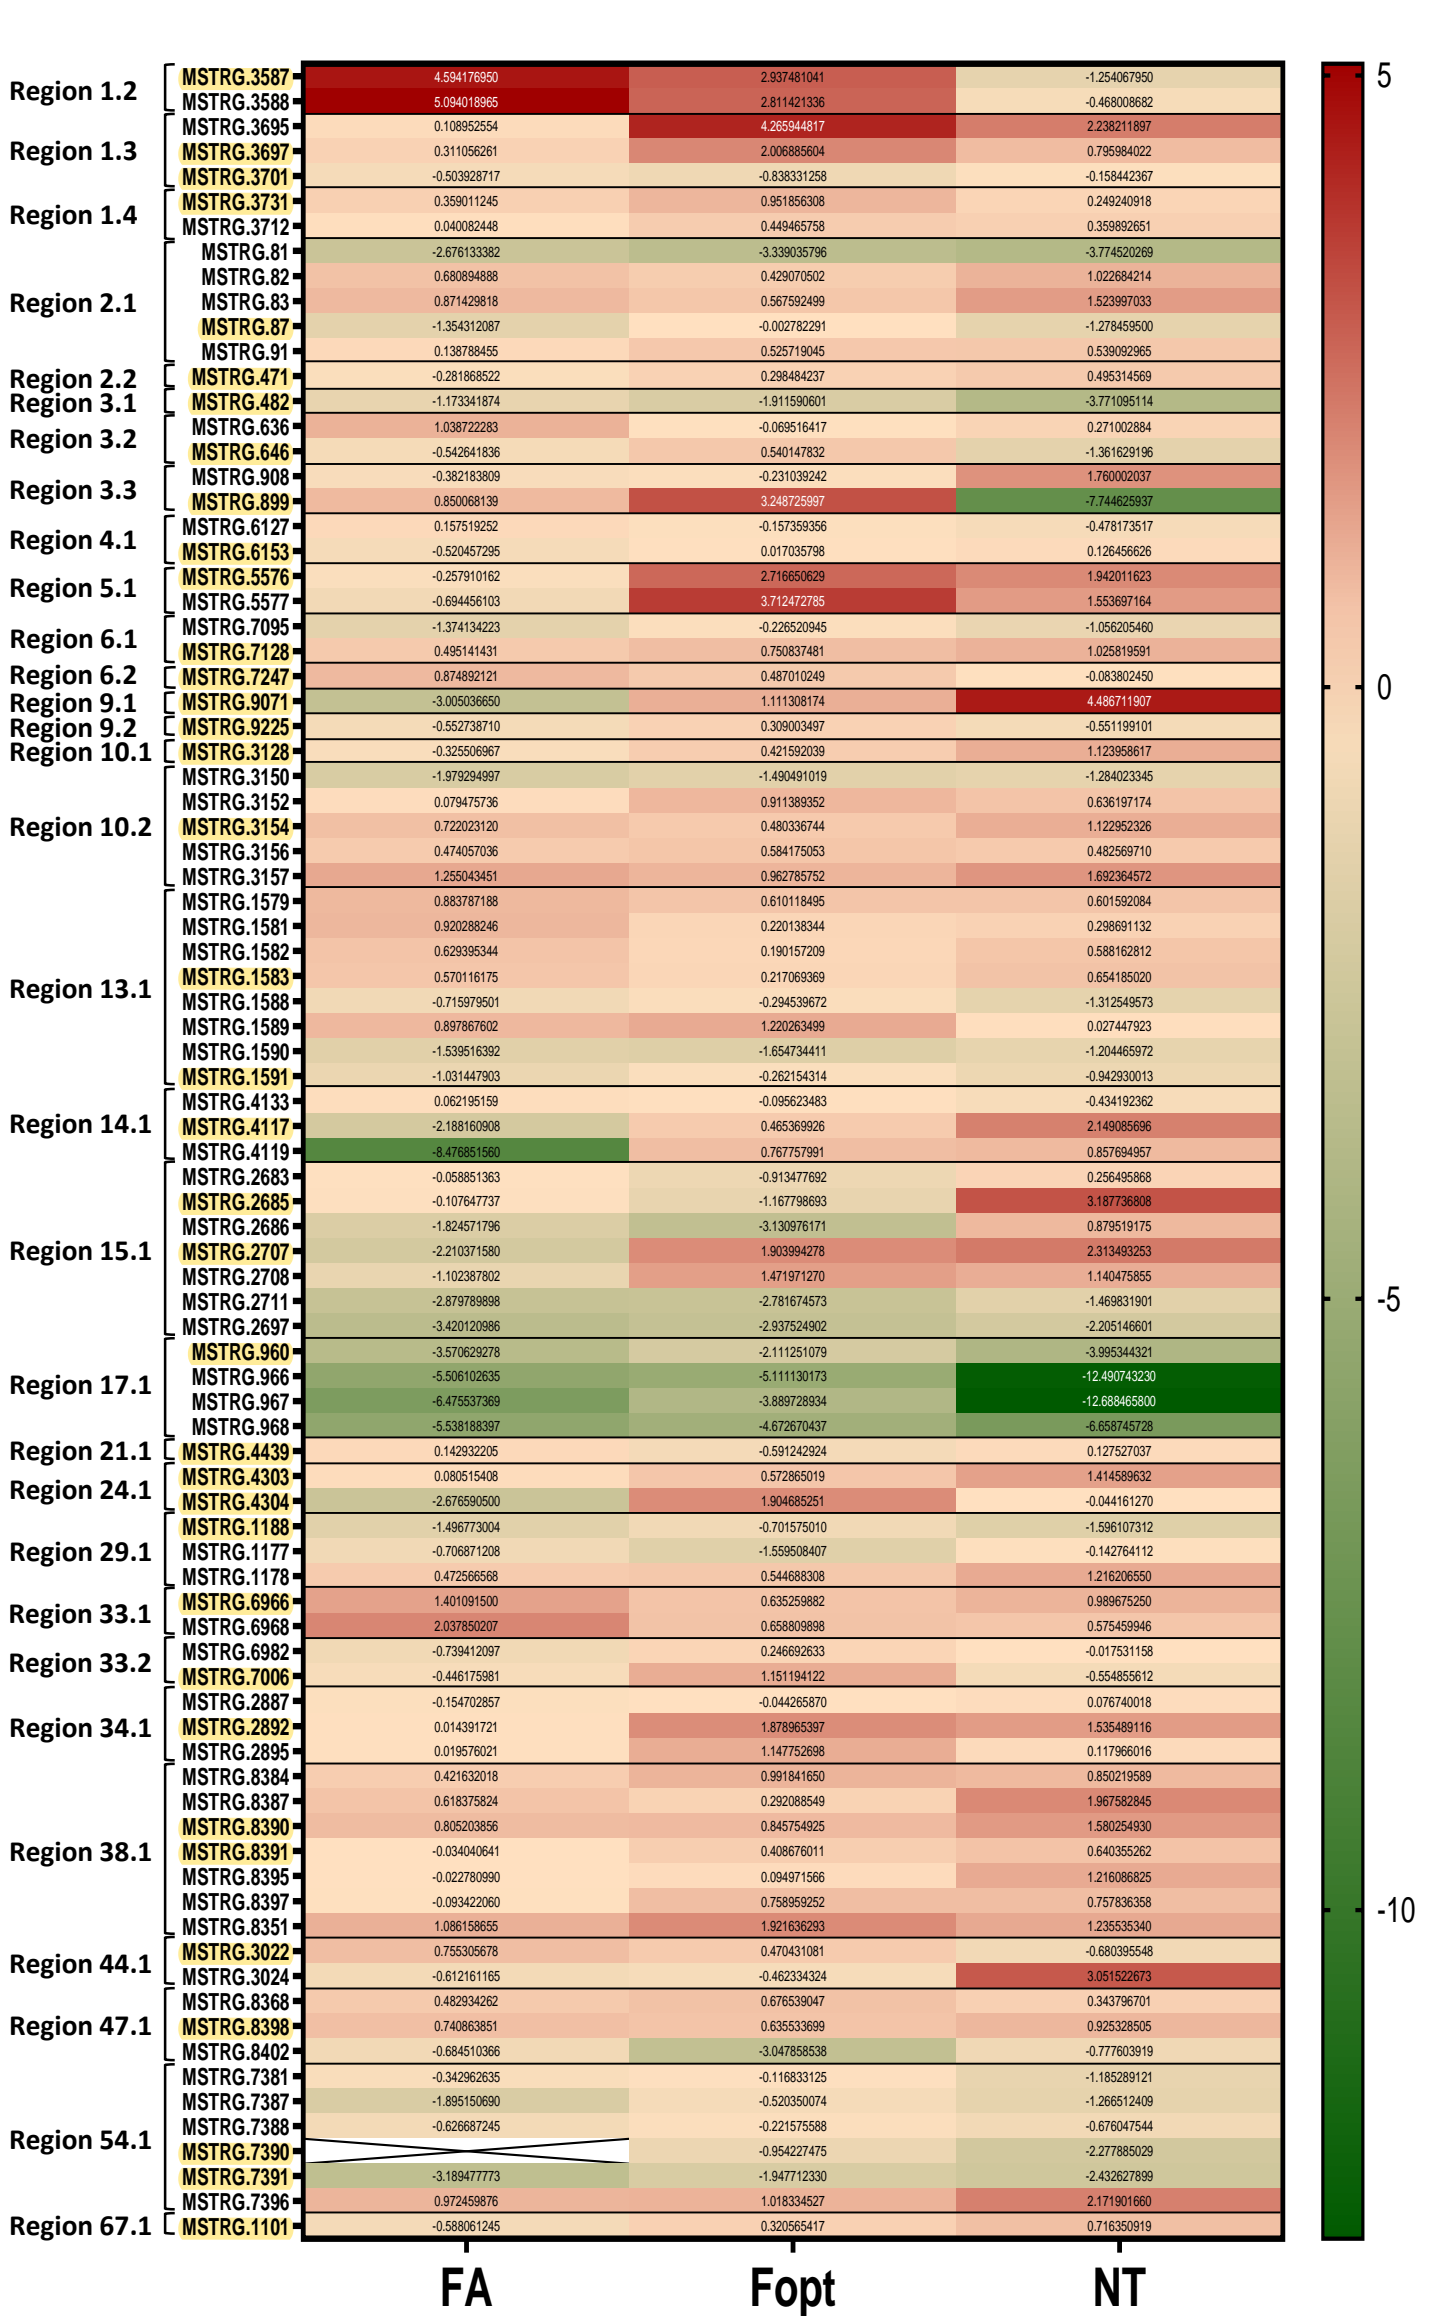

**Fig. S2.** Heatmap demonstrating transcription levels of the core (highlighted) and neighbouring genes in BGCs for all three conditions: FA, Fopt and NT.
